# Supplementary material for: Multilocus Sequence Typing and Virulence Potential of Vibrio parahaemolyticus Strains Isolated from Aquatic Bird Feces
Source: PubMed Central journal article supplement (PMC9241773; doi:10.1128/spectrum.00886-22), 2022-06-13
Supplement: spectrum.00886-22-s0001.pdf [file spectrum.00886-22-s0001.pdf]

# 1 Supplemental materials

2  
3  
4  
5  
6

Figure S1

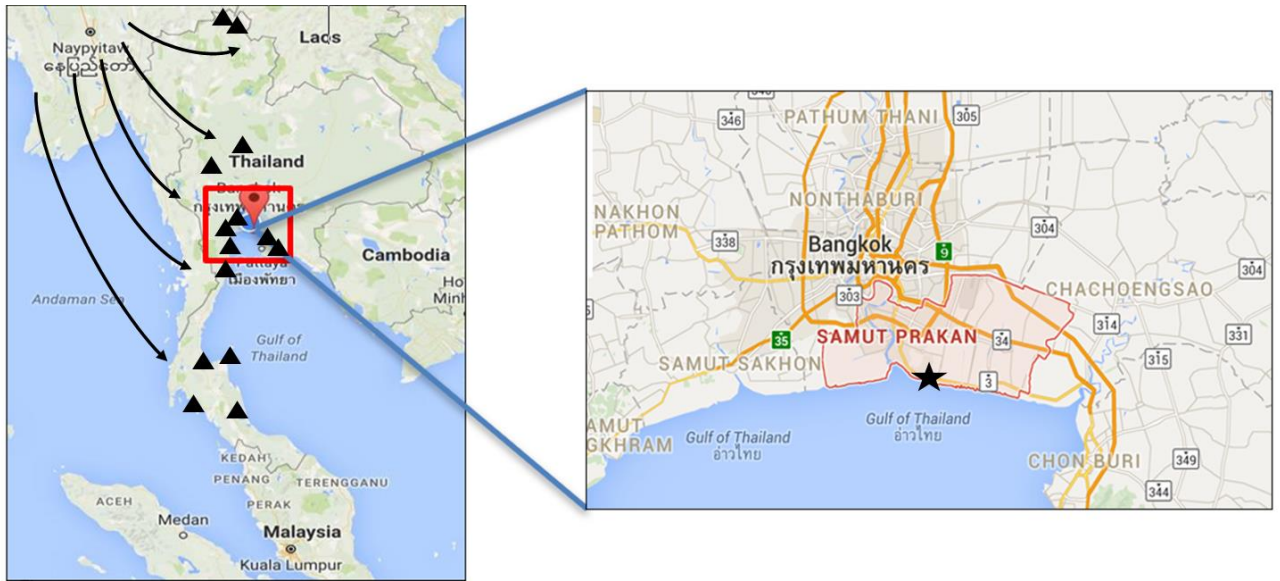

7  
8  
9  
10  
11  
12  
13  
14  
15

Figure S1 Map of sampling site at Bangpu Recreational Center (black star), Samut Prakan, Thailand. Arrows represent migratory direction of Brown-headed gull (*Chroicocephalus brunnicephalus*) from central Asia to inland lakes and coastal regions in southern Asia including Thailand. Triangles represent range map of *C. brunnicephalus* in Thailand. Data provided by Thai National Parks (2022).

16  
17  
18

Figure S2

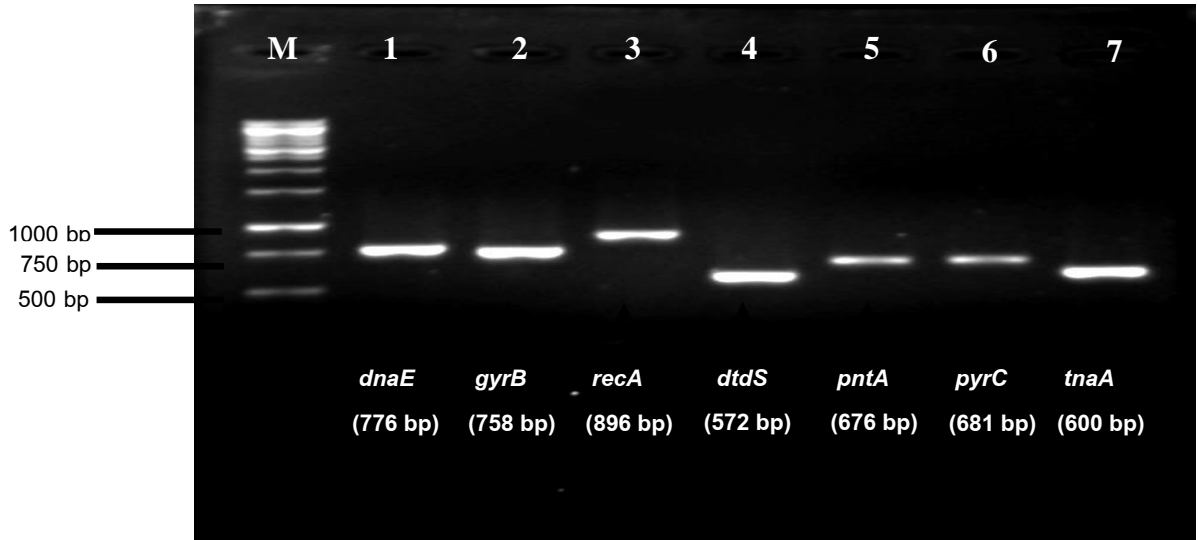

19  
20  
21  
22  
23  
24  
25  
26  
27

**Figure S2 The 1% (w/v) agarose gel electrophoresis of *V. parahaemolyticus* PCR products of 7 housekeeping genes positive control of strain VP902. Lane M: 1 kb ladder (Thermo Scientific, USA); Lane 1-7: PCR products of 7 housekeeping genes including *dnaE* (776 bp), *gyrB* (758 bp), *recA* (896 bp), *dtdS* (572 bp), *pntA* (676 bp), *pyrC* (681 bp) and *tnaA* (600 bp), respectively**

28

### Figure S3

29

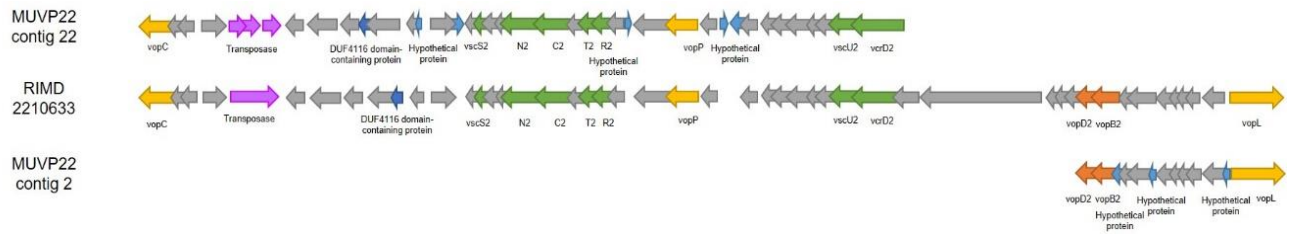

30

31 **Figure S3 Comparison of the gene organization of T3SS $\alpha$ -related genes in *Vibrio***  
32 ***parahaemolyticus* RIMD2210633 and MUV22. Green arrows indicate the gene encoding**  
33 **putative apparatus protein of T3SS2 $\alpha$ , yellow arrows indicate the gene encoding putative**  
34 **effector protein of T3SS2 $\alpha$ , orange arrows indicate the gene encoding putative translocon**  
35 **protein of T3SS2 $\alpha$ , purple arrows indicate transposase genes, dark blue arrows indicate**  
36 **rearranged DUF4116 domain containing protein, light blue arrows indicated additional**  
37 **hypothetical protein, and gray arrows indicate other proteins.**

38

39

40

### Figure S4

41

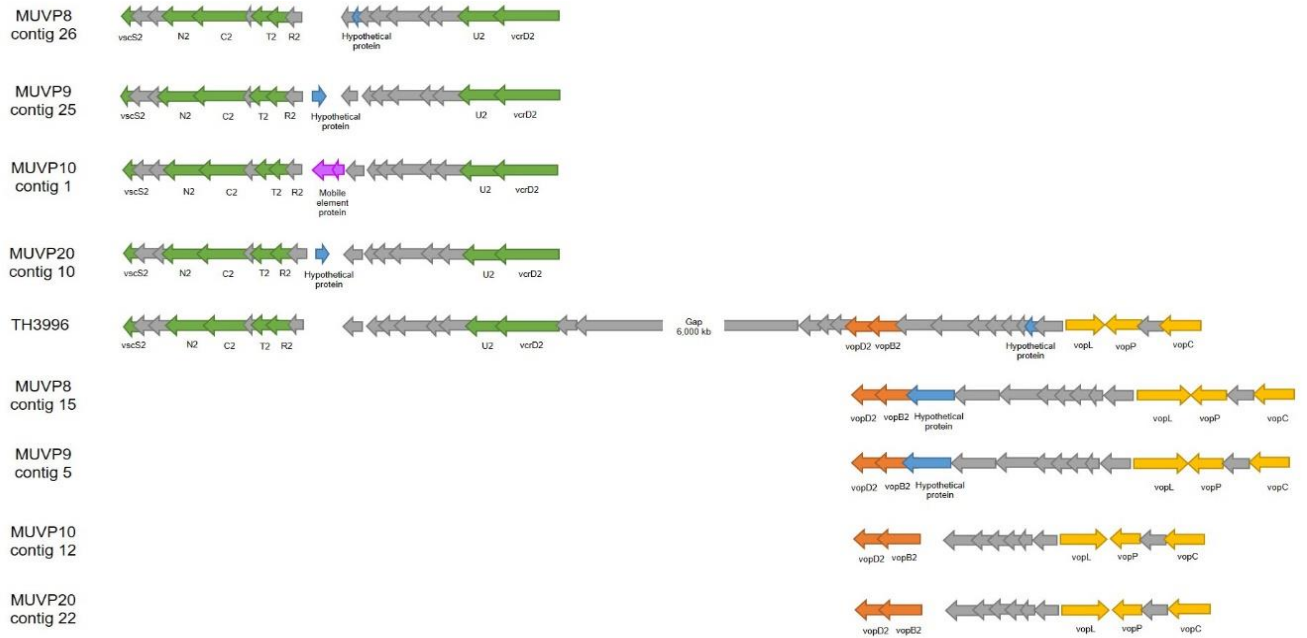

42

43

44 **Figure S4 Comparison of the gene organization of T3SS2 $\beta$ -related genes in *Vibrio***  
45 ***parahaemolyticus* TH3996, MUV8, MUV9, MUV10 and MUV20. Green arrows**  
46 **indicate the gene encoding putative apparatus protein of T3SS2 $\beta$ , yellow arrows indicate**  
47 **the gene encoding putative effector protein of T3SS2 $\beta$ , orange arrows indicate the gene**  
48 **encoding putative translocon protein of T3SS2 $\beta$ , purple arrows indicate mobile element**  
49 **protein, light blue arrows indicated additional hypothetical protein, and gray arrows**  
50 **indicate other proteins.**

51

52 **Table S1 Nucleotide sequence of primers used for detection of species specific and**  
 53 **virulence genes of *Vibrio parahaemolyticus***

54

| Gene                                           | Sequence (5' to 3')                                                      | Product size (bp) | Reference |
|------------------------------------------------|--------------------------------------------------------------------------|-------------------|-----------|
| <i>ldh</i> <sup>a</sup>                        | Forward 5'-AAAGCGGATTATGCAGAAGCACTG3'                                    | 450               | (31)      |
|                                                | Reverse 5'-GCTACTTTCTAGCATTTTCTCTGC-3'                                   |                   |           |
| <i>tdh</i> <sup>b</sup>                        | Forward 5'-GTACCGATATTTTGCAAA-3'                                         | 382               | (33)      |
|                                                | Reverse 5'-ATGTTGAAGCTGTACTIONTGA-3'                                     |                   |           |
| <i>trh</i> <sup>b</sup>                        | Forward 5'-CTCTACTTTGCTTTCAGT-3'                                         | 276               | (34)      |
|                                                | Reverse 5'-TACGCTTATATAGGCGCTTA-3'                                       |                   |           |
| T3SS1                                          | Forward 5'-TCGGTTAGCGAAGGCGTA-3'<br>Reverse 5'-CCGCTGATAATGCCAGTA-3'     | 716               | (16)      |
| VP1680 <sup>c</sup><br>( <i>vopQ</i> )         | Forward 5'-CACTGATGGCGTATCTTGGTC-3'<br>Reverse 5'-GTCAAGCTGAGCGCCAG-3'   | 386               | (35)      |
| T3SS2 $\alpha$ <sup>c</sup><br>( <i>vopP</i> ) | Forward 5'-ATTCACCTTGACTTCTCTGC-3'<br>Reverse 5'-ACCTAAAGATACCGCTGCT-3'  | 379               | (81)      |
| T3SS2 $\beta$ <sup>c</sup><br>( <i>vopC</i> )  | Forward 5'-AACCAACTTGCGACTAAATC-3'<br>Reverse 5'-TCCCGACAGTTTTTCTGCAC-3' | 594               | (32)      |

55 <sup>a</sup>species specific

56 *ldh* = lecithin dependent hemolysin

57 <sup>b</sup>virulence genes

58 *tdh*= thermostable direct hemolysin

59 *trh*= thermostable direct hemolysin-related hemolysin

60 <sup>c</sup>Type 3 secretion system genes

61 T3SS1 = Type 3 secretion system 1

62 T3SS2 $\alpha$  = Type 3 secretion system 2 $\alpha$

63 T3SS2 $\beta$  = Type 3 secretion system 2 $\beta$

64

66 **Table S2 List and properties of 49 *V. parahaemolyticus* isolates from aquatic bird fecal**  
 67 **samples**

| No. | Isolate name | Date of isolation | Virulence genes |            |       |                |               |
|-----|--------------|-------------------|-----------------|------------|-------|----------------|---------------|
|     |              |                   | <i>tdh</i>      | <i>trh</i> | T3SS1 | T3SS2 $\alpha$ | T3SS2 $\beta$ |
| 1   | MUVP1        | 22/08/2016        | -               | -          | +     | -              | -             |
| 2   | MUVP2        | 22/08/2016        | -               | -          | +     | -              | -             |
| 3   | MUVP3        | 22/08/2016        | -               | -          | +     | -              | -             |
| 4   | MUVP4        | 5/9/2016          | -               | -          | +     | -              | -             |
| 5   | MUVP5        | 5/9/2016          | -               | -          | +     | -              | -             |
| 6   | MUVP6        | 5/9/2016          | -               | -          | +     | -              | -             |
| 7   | MUVP7        | 5/9/2016          | -               | -          | +     | -              | -             |
| 8   | MUVP8        | 5/9/2016          | -               | +          | +     | -              | +             |
| 9   | MUVP9        | 3/10/2016         | -               | +          | +     | -              | +             |
| 10  | MUVP10       | 17/10/2016        | -               | +          | +     | -              | +             |
| 11  | MUVP11       | 17/10/2016        | -               | +          | +     | -              | +             |
| 12  | MUVP12       | 31/10/2016        | -               | -          | +     | -              | -             |
| 13  | MUVP13       | 31/10/2016        | -               | -          | +     | -              | -             |
| 14  | MUVP14       | 31/10/2016        | -               | -          | +     | -              | -             |
| 15  | MUVP15       | 31/10/2016        | -               | -          | +     | -              | -             |
| 16  | MUVP16       | 30/01/2017        | -               | -          | +     | -              | -             |
| 17  | MUVP17       | 30/01/2017        | -               | -          | +     | -              | -             |
| 18  | MUVP18       | 14/02/2017        | -               | -          | +     | -              | -             |
| 19  | MUVP19       | 14/02/2017        | -               | -          | +     | -              | -             |
| 20  | MUVP20       | 13/03/2017        | +               | +          | +     | -              | +             |
| 21  | MUVP21       | 27/03/2017        | -               | -          | +     | -              | -             |
| 22  | MUVP22       | 27/03/2017        | +               | -          | +     | +              | -             |
| 23  | MUVP23       | 27/03/2017        | +               | -          | +     | +              | -             |
| 24  | MUVP24       | 27/03/2017        | +               | -          | +     | +              | -             |
| 25  | MUVP25       | 27/03/2017        | -               | -          | +     | -              | -             |
| 26  | MUVP26       | 14/11/2016        | -               | -          | +     | -              | -             |
| 27  | MUVP27       | 14/11/2016        | -               | -          | +     | -              | -             |
| 28  | MUVP28       | 14/11/2016        | -               | -          | +     | -              | -             |
| 29  | MUVP29       | 14/11/2016        | -               | -          | +     | -              | -             |
| 30  | MUVP30       | 28/11/2016        | -               | -          | +     | -              | -             |
| 31  | MUVP31       | 28/11/2016        | -               | -          | +     | -              | -             |
| 32  | MUVP32       | 13/12/2016        | -               | -          | +     | -              | -             |
| 33  | MUVP33       | 13/12/2016        | -               | -          | +     | -              | -             |
| 34  | MUVP34       | 13/12/2016        | -               | -          | +     | -              | -             |
| 35  | MUVP35       | 13/12/2016        | -               | -          | +     | -              | -             |
| 36  | MUVP36       | 30/01/2017        | -               | -          | +     | -              | -             |

**Table S2 List and properties of 49 *V. parahaemolyticus* isolates from aquatic bird fecal samples (cont.)**

| No. | Isolates name | Date of isolation | Virulence genes |            |       |                |               |
|-----|---------------|-------------------|-----------------|------------|-------|----------------|---------------|
|     |               |                   | <i>tdh</i>      | <i>trh</i> | T3SS1 | T3SS2 $\alpha$ | T3SS2 $\beta$ |
| 37  | MUVP37        | 30/01/2017        | -               | -          | +     | -              | -             |
| 38  | MUVP38        | 30/01/2017        | -               | -          | +     | -              | -             |
| 39  | MUVP39        | 30/01/2017        | -               | -          | +     | -              | -             |
| 40  | MUVP40        | 14/02/2017        | -               | -          | +     | -              | -             |
| 41  | MUVP41        | 27/02/2017        | -               | -          | +     | -              | -             |
| 42  | MUVP42        | 13/03/2017        | -               | -          | +     | -              | -             |
| 43  | MUVP43        | 13/03/2017        | -               | -          | +     | -              | -             |
| 44  | MUVP45        | 28/04/2017        | -               | -          | +     | -              | -             |
| 45  | MUVP46        | 28/04/2017        | -               | -          | +     | -              | -             |
| 46  | MUVP47        | 28/04/2017        | -               | -          | +     | -              | -             |
| 47  | MUVP48        | 28/04/2017        | -               | -          | +     | -              | -             |
| 48  | MUVP49        | 28/04/2017        | -               | -          | +     | -              | -             |
| 49  | MUVP50        | 28/04/2017        | -               | -          | +     | -              | -             |

68

69

70
